# Supplementary material for: Influence of the Composition of Cationic Liposomes on the Performance of Cargo Immunostimulatory RNA
Source: MDPI journal article supplement (doi:10.3390/pharmaceutics15092184), 2023-08-23
Supplement: s1 [file s1]

**Table S1:** Cytokines profiling measured using LEGEND plex™ Mouse Inflammation Panel (13-plex) kit after injections with isRNA + liposomes of different structures. The data represent mean ± standard deviation (SD) calculated from measurements from at least three mice. Statistically significant differences between experimental groups and the Control group are indicated by asterisk (\*\*\* = P value ≤0.0001, \*\* = P value <0.001, \* = P value <0.05); ordinary Two-way ANOVA, Dunnett's multiple comparisons test.

|                 | CTRL        | 2X3               | F12               | P800               | P800(4%)          | P800+F12        | diP800            | diP800(4%)         | diP800+F12       | P1500              | diP1500           | P2000              | diP2000          |
|-----------------|-------------|-------------------|-------------------|--------------------|-------------------|-----------------|-------------------|--------------------|------------------|--------------------|-------------------|--------------------|------------------|
| <b>IL-23</b>    | 0           | 29.11±10.15       | 0                 | 0                  | 0                 | 0               | 0                 | 4.85±11.88 ***     | 13.39±2.078      | 0                  | 0                 | 0                  | 38.2±15.39       |
| <b>IL-1α</b>    | 58.33±15.75 | 151.44±14.92      | 31.26±2.15        | 90.87±7.94         | 47.05±21.28       | 33.38±1.36      | 254.06±7.08       | 331.306±314.91     | 58.85±2.80       | 74.35±15.89        | 58.31±33.98       | 25.85±10.98        | 59.04±2.056      |
| <b>IFN-γ</b>    | 0           | 180.18±63.75 *    | 451.09±138.24 *** | 832.43±340.51 ***  | 608.68±67.84 ***  | 279.41±10.82 ** | 286.02±7.615 ***  | 567.56±31.56 ***   | 273.59±59.38 *** | 753.63±71.64 ***   | 105.73±26.17      | 191.45±8.02 *      | 0                |
| <b>TNF-α</b>    | 0           | 124.31±25.19      | 79.48±34.03       | 140.36±49.10       | 150.53±32.78      | 0               | 285.8±14.31       | 160.67±8.200 **    | 66.09±19.29 ***  | 188.05±16.97       | 0                 | 79.75±0            | 106.45±56.60 *** |
| <b>MCP-1</b>    | 0           | 483.68±146.37 *** | 887.88±243.91 *** | 1488.43±131.06 *** | 919.51±183.54 *** | 70.41±5.51      | 903.56±169.44 *** | 1220.31±241.35 *** | 672.23±62.69 *** | 2101.24±857.31 *** | 773.48±214.73 *** | 1239.09±370.26 *** | 586.81±120.2     |
| <b>IL-12p70</b> | 0           | 15.04±6.47        | 19.95±6.46        | 15.26±3.45         | 29.69±5.47        | 0               | 9.85±1.55         | 26.41±5.59         | 13.85±1.070      | 37.57±16.18        | 0                 | 167.8±0            | 0                |
| <b>IL-1β</b>    | 0           | 0                 | 0                 | 0                  | 0                 | 0               | 110.28±56.08      | 0                  | 23.68±12.00      | 0                  | 0                 | 0                  | 0                |
| <b>IL-10</b>    | 0           | 103.1±10.61       | 0                 | 0                  | 0                 | 0               | 248.29±147.71 **  | 0                  | 52.47±42.10      | 0                  | 0                 | 196.27±25.44 **    | 0                |
| <b>IL-6</b>     | 3.98±1.46   | 120.31±56.47      | 85.11±41.76       | 181.53±48.86 *     | 100.72±51.04      | 87.77±5.05      | 228.63±2.08       | 127.65±38.89       | 103.11±6.48      | 277.3±64.89 ***    | 180.88±100.71 *   | 193.58±82.48       | 171.87±65.99     |
| <b>IL-27</b>    | 0           | 236.5±61.99       | 0                 | 22.38±0            | 0                 | 0               | 95.44±17.82       | 0                  | 65.77±55.68      | 139.66±107.37 *    | 0                 | 0                  | 0                |
| <b>IL-17A</b>   | 0           | 3.05±1.20         | 0.57±0            | 0                  | 0                 | 0               | 14.81±9.20        | 0                  | 4.17±3.89        | 0                  | 0                 | 0                  | 0                |
| <b>IFN-β</b>    | 0           | 28.26±13.56       | 97.97±36.84       | 118.44±21.99       | 142.57±24.90      | 0               | 31.88±9.52        | 140.85±2.075       | 46.13±34.58      | 330.35±55.69 ***   | 122.97±32.03      | 274.98±38.28       | 49.62±30.55      |
| <b>GM-CSF</b>   | 3.31±5.17   | 7.45±1.71         | 0                 | 0                  | 0                 | 0               | 23.69±1.56        | 0                  | 0                | 0                  | 0                 | 63.79±0.1          | 7.32±1.55        |

**A**

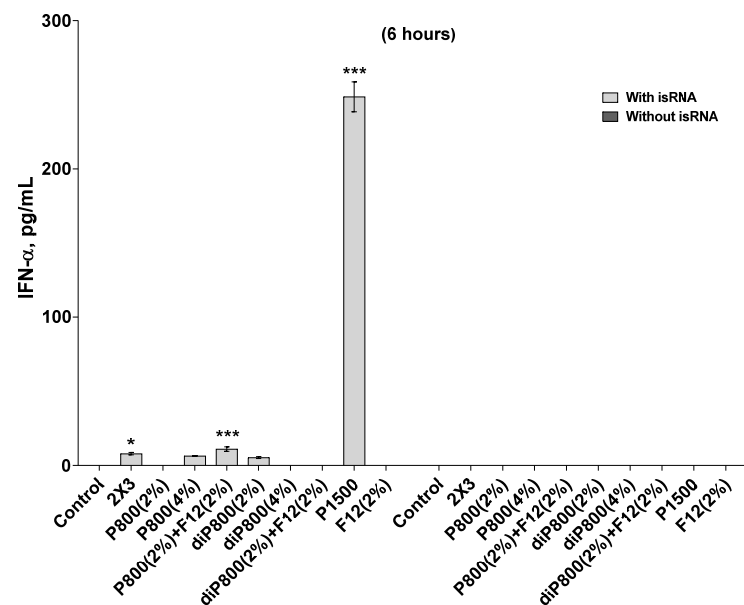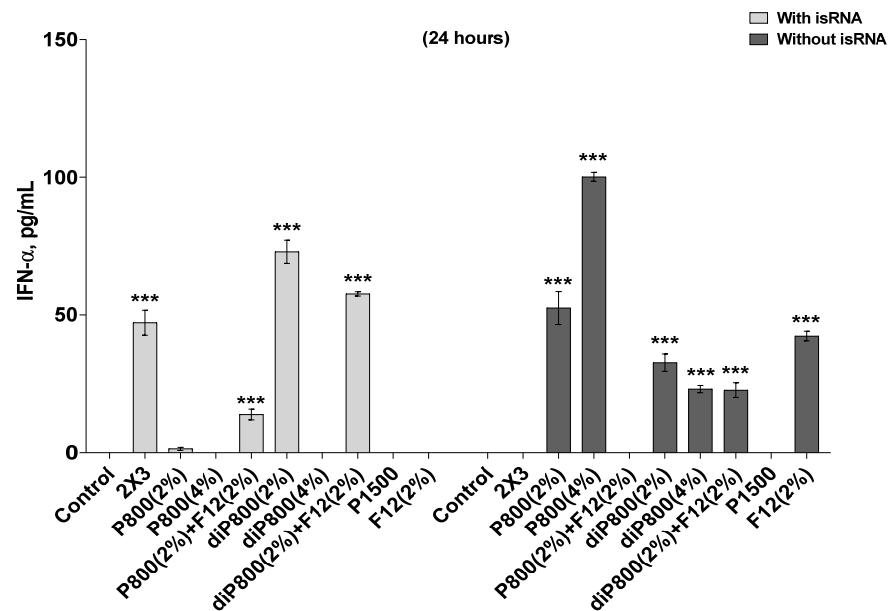

**B**

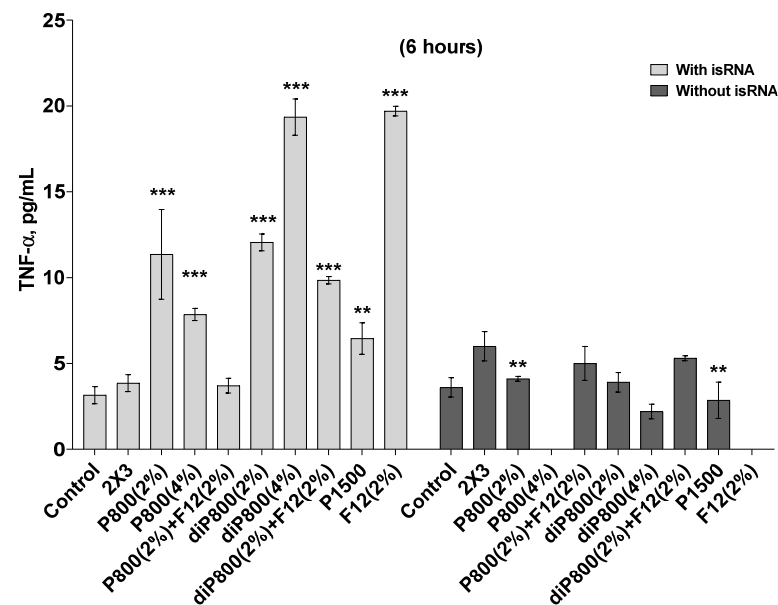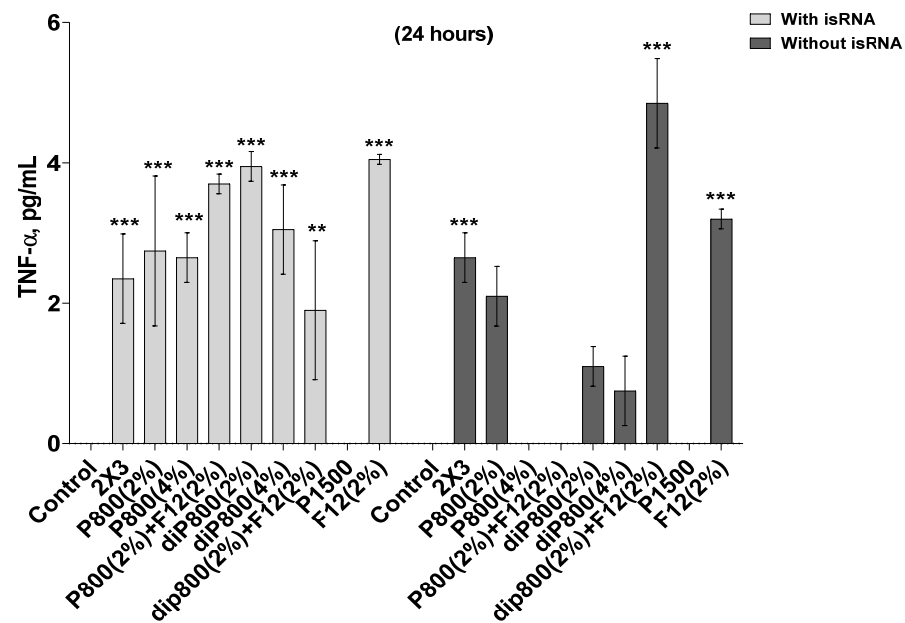

C

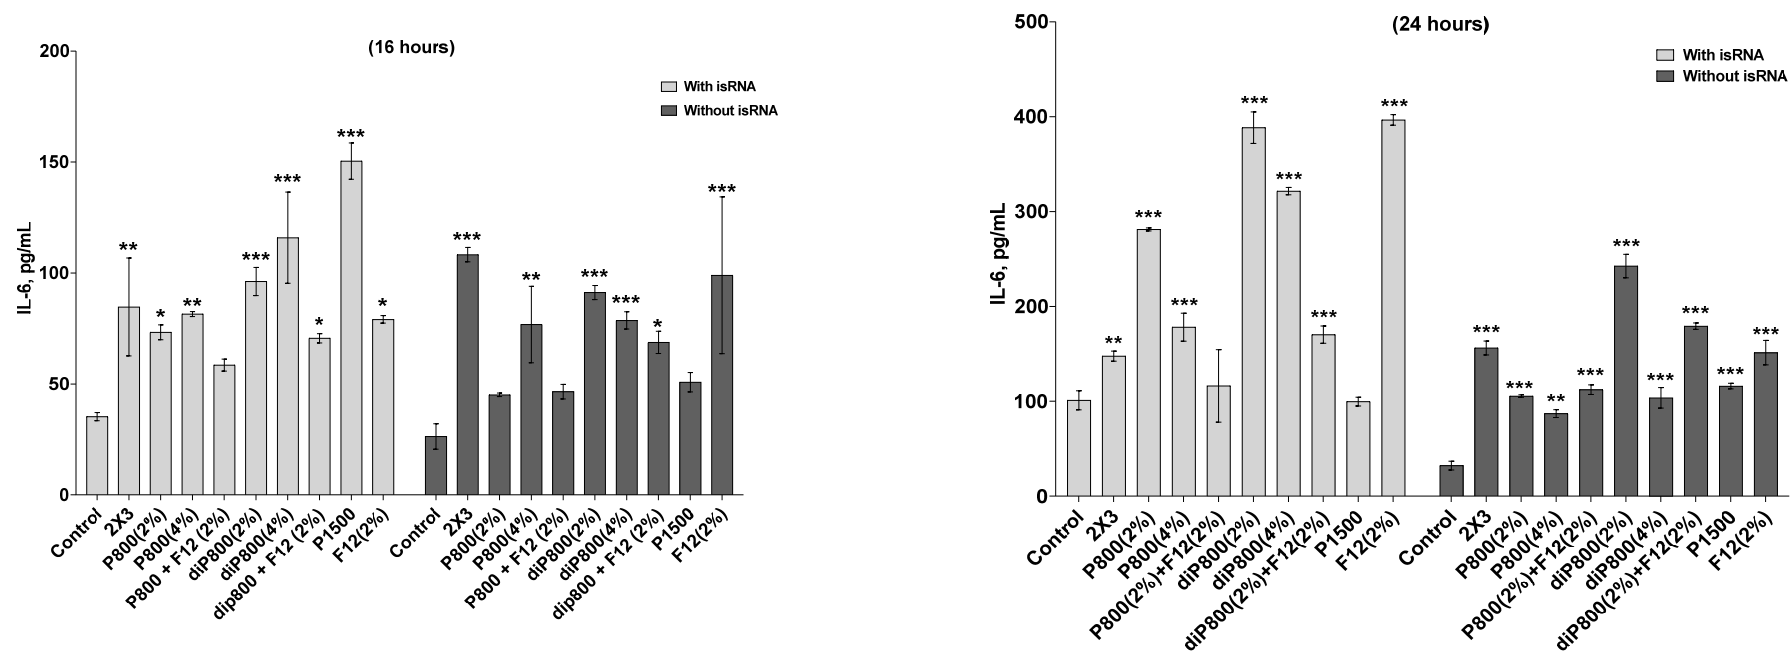

**Supplementary Figure S1.** Cytokines levels in human PBMCs primary cell culture after the transfection of isRNA/liposomes. The levels of IFN- $\alpha$  (A) and TNF- $\alpha$  (B) 6 and 24 h after transfection, the levels IL-6 (C) 16 and 24 h after transfection were measured by ELISA. The data represent mean  $\pm$  standard deviation (SD). Statistically significant differences between samples treated with isRNA/liposomes and the samples treated with only liposomes are indicated by asterisk (\* = P value <0.05, \*\* = P value <0.01, \*\*\* = P value <0.001); ordinary two-way ANOVA, Dunnett's multiple comparisons test.

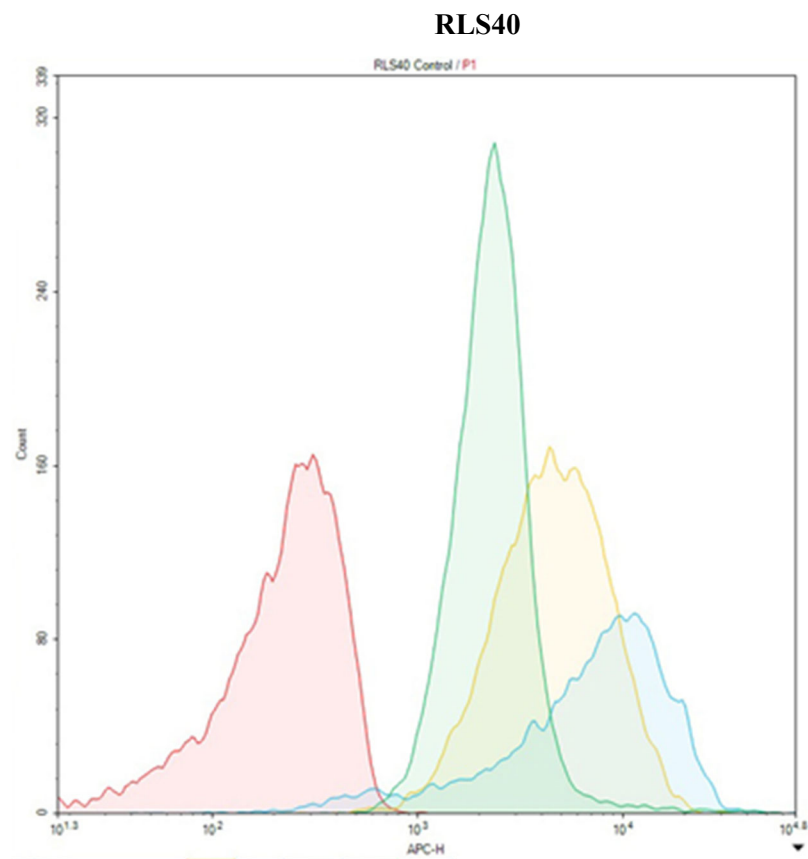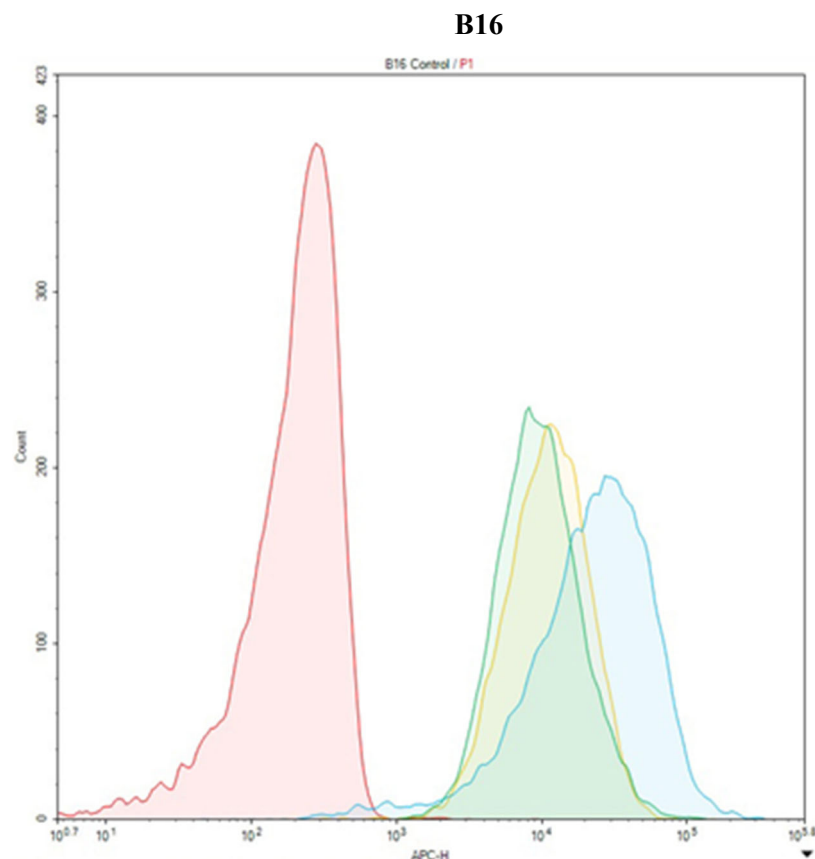

**Supplementary Figure S2.** Representative flow histograms of Cy5.5-isRNA and its complexes with liposomes accumulation in B16 and RLS40 cells. The accumulation was measured 4 h after transfection of Cy5.5-isRNA mediated by liposomes. Red – untreated cells cell, Green – cells incubated with -siRNA, Yellow – cells incubated with Cy5.5-isRNA/P2000 complexes, Blue – cells incubated with Cy5.5-isRNA/2X3-DOPE complexes.
